# Supplementary figures and images for: Highly Active Large Au Clusters and Even More Active Ag Nanoparticles Supported on Ceria-Zirconia: Impact of Particle Size and Potassium Ion Loading on Activity in Catalytic Transfer Hydrogenation
Source: MDPI journal article supplement (doi:10.3390/catal12090974), 2022-08-30

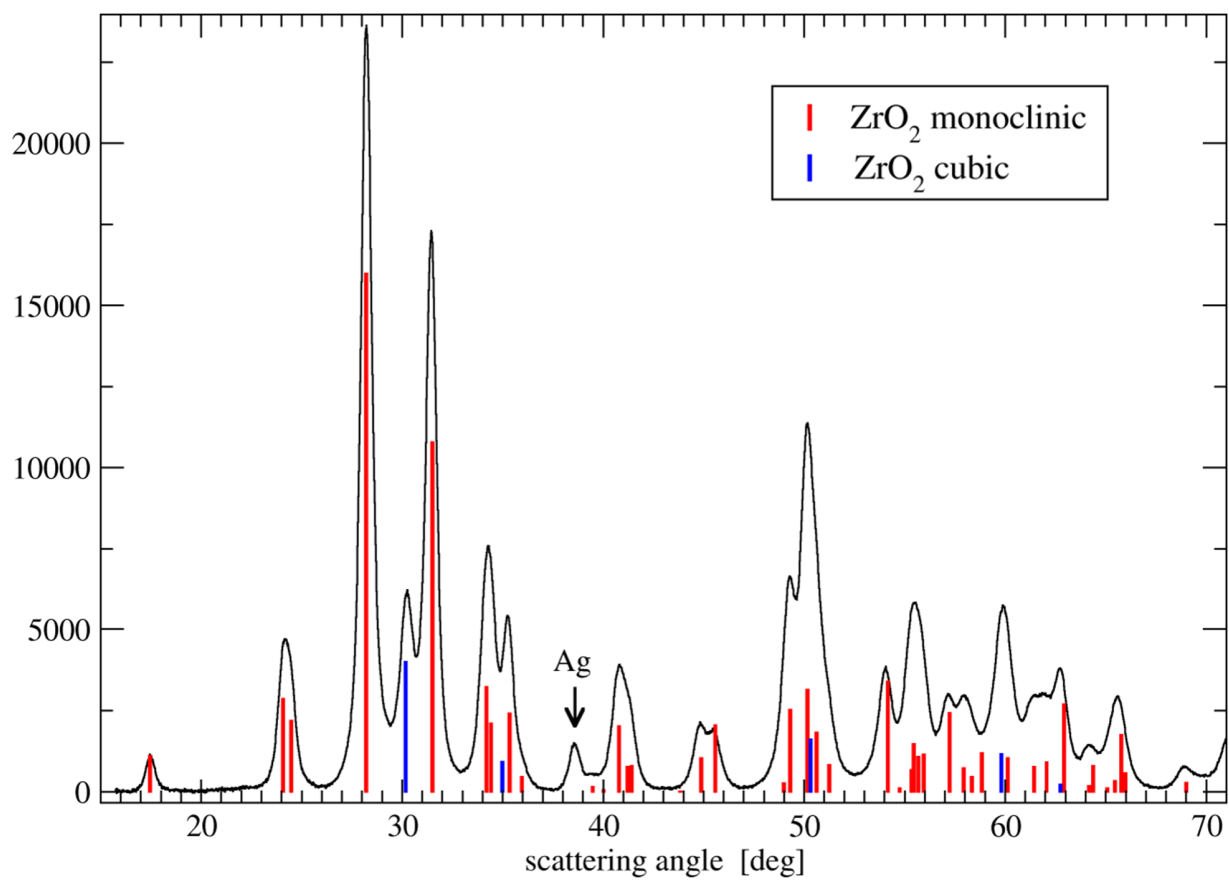

**Figure S1:** Assignment of reflexes of Ag/ZrO<sub>2</sub> to two zirconia polymorphs.

Supplement: s1 [file s1]
